# Supplementary material
Source: PubMed Central journal article supplement (PMC3869705)

# Figure S1

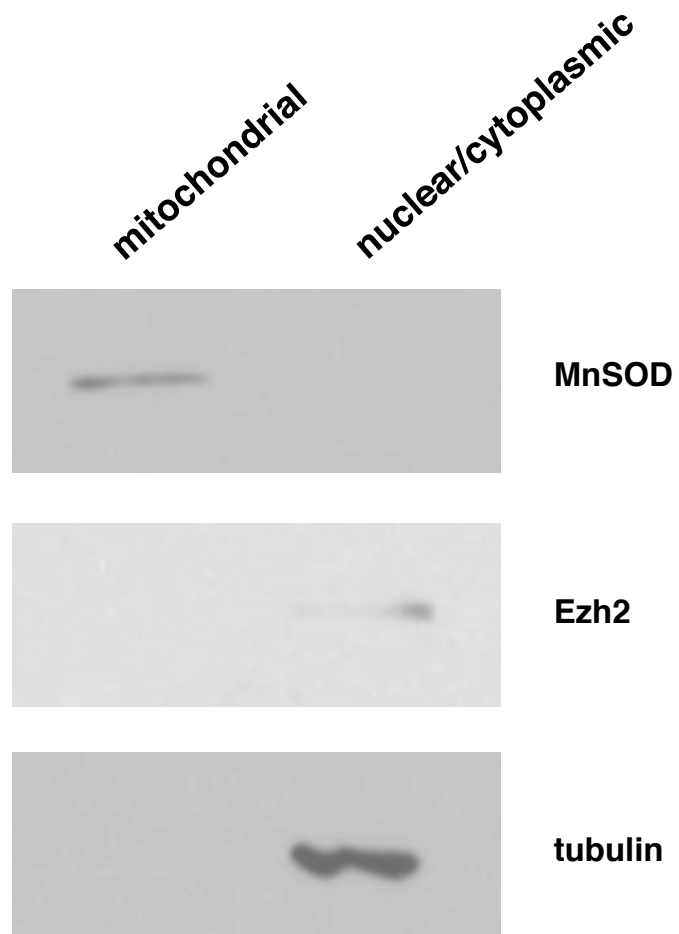

# Figure S2

| Accession | Description                                                       | # AAs | MW [kDa] | $\Sigma$ Coverage | $\Sigma$ # Unique Peptides | $\Sigma$ # PSMs |
|-----------|-------------------------------------------------------------------|-------|----------|-------------------|----------------------------|-----------------|
| P45880    | Voltage-dependent anion-selective channel protein 2 [VDAC2_HUMAN] | 294   | 31.5     | 43.54             | 8                          | 25              |

Sequence : LTFDITTFSPNTGKK (2 items)

| # Missed Cleavages | Charge | m/z [Da]  | MH+ [Da]   | $\Delta$ M [ppm] | Modifications | Activation Type | Confidence | XCorr | q-Value | PEP       | $\Delta$ Cn |
|--------------------|--------|-----------|------------|------------------|---------------|-----------------|------------|-------|---------|-----------|-------------|
| 1                  | 2      | 779.56580 | 1558.12432 | 852.79           |               | CID             | < 1% FDR   | 2.89  | 0       | 8.013E-03 | 0.00        |
| 1                  | 2      | 779.63800 | 1558.26872 | 945.38           |               | CID             | < 1% FDR   | 3.42  | 0       | 6.599E-04 | 0.00        |

Sequence : LTLSALVDGK (2 items)

| # Missed Cleavages | Charge | m/z [Da]  | MH+ [Da]   | $\Delta$ M [ppm] | Modifications | Activation Type | Confidence | XCorr | q-Value | PEP       | $\Delta$ Cn |
|--------------------|--------|-----------|------------|------------------|---------------|-----------------|------------|-------|---------|-----------|-------------|
| 0                  | 2      | 509.03424 | 1017.06120 | 454.75           |               | CID             | < 1% FDR   | 2.38  | 0       | 6.622E-03 | 0.00        |
| 0                  | 2      | 509.36465 | 1017.72203 | 1103.78          |               | CID             | < 1% FDR   | 2.85  | 0       | 3.614E-03 | 0.00        |

Sequence : NNFAVGYR (2 items)

| # Missed Cleavages | Charge | m/z [Da]  | MH+ [Da]  | $\Delta$ M [ppm] | Modifications | Activation Type | Confidence | XCorr | q-Value | PEP       | $\Delta$ Cn |
|--------------------|--------|-----------|-----------|------------------|---------------|-----------------|------------|-------|---------|-----------|-------------|
| 0                  | 2      | 470.93692 | 940.86656 | 428.32           |               | CID             | < 1% FDR   | 3.01  | 0       | 6.285E-03 | 0.00        |
| 0                  | 2      | 470.87732 | 940.74736 | 301.67           |               | CID             | < 1% FDR   | 2.79  | 0       | 7.520E-03 | 0.00        |

Sequence : ScSGVEFSTSGSSNTDTGK (4 items)

| # Missed Cleavages | Charge | m/z [Da]  | MH+ [Da]   | $\Delta$ M [ppm] | Modifications       | Activation Type | Confidence | XCorr | q-Value | PEP       | $\Delta$ Cn |
|--------------------|--------|-----------|------------|------------------|---------------------|-----------------|------------|-------|---------|-----------|-------------|
| 0                  | 2      | 954.62878 | 1908.25029 | 239.95           | C2(Carbamidomethyl) | CID             | < 1% FDR   | 4.43  | 0       | 3.977E-04 | 0.00        |
| 0                  | 2      | 955.07861 | 1909.14995 | 711.07           | C2(Carbamidomethyl) | CID             | < 1% FDR   | 4.18  | 0       | 4.407E-04 | 0.00        |
| 0                  | 2      | 954.60583 | 1908.20439 | 215.90           | C2(Carbamidomethyl) | CID             | < 1% FDR   | 4.49  | 0       | 1.004E-05 | 0.00        |
| 0                  | 2      | 955.00671 | 1909.00615 | 635.79           | C2(Carbamidomethyl) | CID             | < 1% FDR   | 5.10  | 0       | 9.215E-06 | 0.00        |

Sequence : TGDFQLHTNVNDGTEFGGSYQK (1 item)

| # Missed Cleavages | Charge | m/z [Da]  | MH+ [Da]   | $\Delta$ M [ppm] | Modifications | Activation Type | Confidence | XCorr | q-Value | PEP       | $\Delta$ Cn |
|--------------------|--------|-----------|------------|------------------|---------------|-----------------|------------|-------|---------|-----------|-------------|
| 0                  | 3      | 843.65515 | 2528.95090 | 309.21           |               | CID             | < 1% FDR   | 4.53  | 0       | 7.140E-06 | 0.00        |

Sequence : VNNSLIGVGYTQLRPGVK (6 items)

| # Missed Cleavages | Charge | m/z [Da]   | MH+ [Da]   | $\Delta$ M [ppm] | Modifications | Activation Type | Confidence | XCorr | q-Value | PEP       | $\Delta$ Cn |
|--------------------|--------|------------|------------|------------------|---------------|-----------------|------------|-------|---------|-----------|-------------|
| 0                  | 3      | 701.99097  | 2103.95835 | 381.46           |               | CID             | < 1% FDR   | 3.02  | 0       | 7.583E-03 | 0.00        |
| 0                  | 3      | 702.04419  | 2104.11802 | 457.32           |               | CID             | < 1% FDR   | 2.96  | 0       | 9.861E-03 | 0.00        |
| 0                  | 2      | 1052.24390 | 2103.48052 | 154.39           |               | CID             | < 1% FDR   | 3.89  | 0       | 9.732E-06 | 0.00        |
| 0                  | 2      | 1052.24634 | 2103.48540 | 156.71           |               | CID             | < 1% FDR   | 4.14  | 0       | 5.433E-05 | 0.00        |
| 0                  | 2      | 1052.18677 | 2103.36626 | 100.08           |               | CID             | < 1% FDR   | 4.56  | 0       | 1.442E-06 | 0.00        |
| 0                  | 2      | 1052.25659 | 2103.50591 | 166.46           |               | CID             | < 1% FDR   | 4.43  | 0       | 2.345E-05 | 0.00        |

Sequence : WNTDNTLGTEIAIEDQIcQGLK (1 item)

| # Missed Cleavages | Charge | m/z [Da]  | MH+ [Da]   | $\Delta$ M [ppm] | Modifications        | Activation Type | Confidence | XCorr | q-Value | PEP       | $\Delta$ Cn |
|--------------------|--------|-----------|------------|------------------|----------------------|-----------------|------------|-------|---------|-----------|-------------|
| 0                  | 3      | 840.71796 | 2520.13932 | 369.41           | C18(Carbamidomethyl) | CID             | < 1% FDR   | 4.25  | 0       | 6.012E-04 | 0.00        |

Sequence : YQLDPTASISAK (3 items)

| # Missed Cleavages | Charge | m/z [Da]  | MH+ [Da]   | $\Delta$ M [ppm] | Modifications | Activation Type | Confidence | XCorr | q-Value | PEP       | $\Delta$ Cn |
|--------------------|--------|-----------|------------|------------------|---------------|-----------------|------------|-------|---------|-----------|-------------|
| 0                  | 2      | 647.53613 | 1294.06499 | 306.35           |               | CID             | < 1% FDR   | 2.85  | 0       | 3.705E-05 | 0.00        |
| 0                  | 2      | 647.55145 | 1294.09563 | 330.02           |               | CID             | < 1% FDR   | 2.49  | 0       | 3.630E-03 | 0.00        |
| 0                  | 2      | 647.53448 | 1294.06169 | 303.80           |               | CID             | < 1% FDR   | 2.37  | 0       | 5.838E-04 | 0.00        |

**Figure S3**

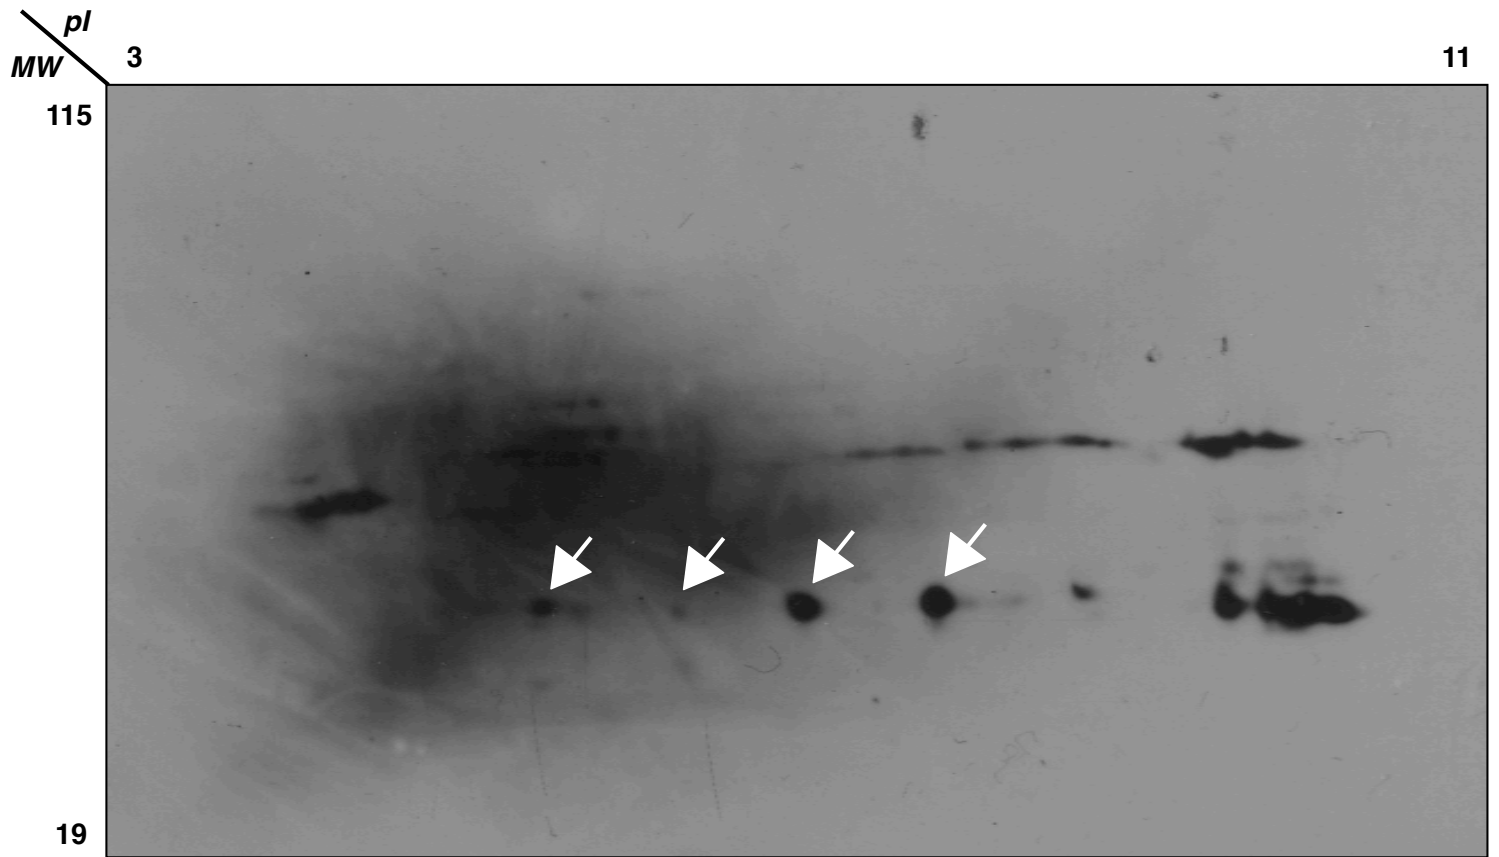

**VDAC2**

# Figure S4

| Accession | Description                                                       | # AAs | MW [kDa] | ΣCoverage | Σ# Unique Peptides | Σ# PSMs |
|-----------|-------------------------------------------------------------------|-------|----------|-----------|--------------------|---------|
| P45880    | Voltage-dependent anion-selective channel protein 2 [VDAC2_HUMAN] | 294   | 31.5     | 35.71     | 8                  | 66      |

Sequence : LTFDITTFSPNTGK (2 items)

| # Missed Cleavages | Charge | m/z [Da]  | MH+ [Da]   | ΔM [ppm] | Modifications | Activation Type | Confidence | XCorr | q-Value | PEP       | ΔCn  |
|--------------------|--------|-----------|------------|----------|---------------|-----------------|------------|-------|---------|-----------|------|
| 0                  | 2      | 714.85278 | 1428.69829 | -1.61    |               | CID             | < 1% FDR   | 3.69  | 0       | 2.932E-06 | 0.00 |
| 0                  | 2      | 714.85199 | 1428.69670 | -2.72    |               | CID             | < 1% FDR   | 1.67  | 0.00046 | 2.988E-03 | 0.00 |

Sequence : LTLALVDGK (3 items)

| # Missed Cleavages | Charge | m/z [Da]  | MH+ [Da]   | ΔM [ppm] | Modifications | Activation Type | Confidence | XCorr | q-Value | PEP       | ΔCn  |
|--------------------|--------|-----------|------------|----------|---------------|-----------------|------------|-------|---------|-----------|------|
| 0                  | 2      | 508.80194 | 1016.59661 | -2.05    |               | CID             | < 1% FDR   | 2.60  | 0       | 2.654E-04 | 0.00 |
| 0                  | 2      | 508.80167 | 1016.59606 | -2.59    |               | CID             | < 1% FDR   | 3.01  | 0       | 1.706E-05 | 0.00 |
| 0                  | 2      | 508.80295 | 1016.59862 | -0.07    |               | CID             | < 1% FDR   | 2.22  | 0.00057 | 4.554E-03 | 0.00 |

Sequence : ScSGVEFSTSGSSNTDTGK (47 items)

| # Missed Cleavages | Charge | m/z [Da]  | MH+ [Da]   | ΔM [ppm] | Modifications       | Activation Type | Confidence | XCorr | q-Value | PEP       | ΔCn  |
|--------------------|--------|-----------|------------|----------|---------------------|-----------------|------------|-------|---------|-----------|------|
| 0                  | 2      | 954.40057 | 1907.79387 | 0.76     | C2(Carbamidomethyl) | CID             | < 1% FDR   | 5.01  | 0       | 1.536E-08 | 0.00 |
| 0                  | 2      | 954.39929 | 1907.79131 | -0.58    | C2(Carbamidomethyl) | CID             | < 1% FDR   | 4.55  | 0       | 8.330E-09 | 0.00 |
| 0                  | 3      | 636.60199 | 1907.79142 | -0.52    | C2(Carbamidomethyl) | CID             | < 1% FDR   | 3.34  | 0       | 1.539E-08 | 0.00 |
| 0                  | 2      | 954.39905 | 1907.79082 | -0.84    | C2(Carbamidomethyl) | CID             | < 1% FDR   | 3.29  | 0       | 1.774E-06 | 0.00 |
| 0                  | 2      | 954.39771 | 1907.78813 | -2.24    | C2(Carbamidomethyl) | CID             | < 1% FDR   | 3.21  | 0       | 1.436E-05 | 0.00 |
| 0                  | 2      | 954.39929 | 1907.79131 | -0.58    | C2(Carbamidomethyl) | CID             | < 1% FDR   | 5.28  | 0       | 3.660E-09 | 0.00 |
| 0                  | 2      | 954.39917 | 1907.79106 | -0.71    | C2(Carbamidomethyl) | CID             | < 1% FDR   | 5.27  | 0       | 3.720E-09 | 0.00 |
| 0                  | 3      | 636.60144 | 1907.78977 | -1.39    | C2(Carbamidomethyl) | CID             | < 1% FDR   | 3.24  | 0       | 6.957E-06 | 0.00 |
| 0                  | 2      | 954.39874 | 1907.79021 | -1.16    | C2(Carbamidomethyl) | CID             | < 1% FDR   | 3.16  | 0       | 5.989E-04 | 0.00 |
| 0                  | 2      | 954.39899 | 1907.79070 | -0.90    | C2(Carbamidomethyl) | CID             | < 1% FDR   | 3.42  | 0       | 2.532E-04 | 0.00 |
| 0                  | 2      | 954.39905 | 1907.79082 | -0.84    | C2(Carbamidomethyl) | CID             | < 1% FDR   | 5.16  | 0       | 6.216E-10 | 0.00 |
| 0                  | 2      | 954.40112 | 1907.79497 | 1.34     | C2(Carbamidomethyl) | CID             | < 1% FDR   | 4.76  | 0       | 9.438E-08 | 0.00 |
| 0                  | 3      | 636.60071 | 1907.78757 | -2.54    | C2(Carbamidomethyl) | CID             | < 1% FDR   | 2.16  | 0.00069 | 7.546E-03 | 0.00 |
| 0                  | 3      | 636.60156 | 1907.79013 | -1.20    | C2(Carbamidomethyl) | CID             | < 1% FDR   | 3.14  | 0       | 1.747E-05 | 0.00 |
| 0                  | 2      | 954.40033 | 1907.79338 | 0.51     | C2(Carbamidomethyl) | CID             | < 1% FDR   | 4.68  | 0       | 7.026E-10 | 0.00 |
| 0                  | 2      | 954.40039 | 1907.79350 | 0.57     | C2(Carbamidomethyl) | CID             | < 1% FDR   | 4.88  | 0       | 2.145E-09 | 0.00 |
| 0                  | 3      | 636.60181 | 1907.79087 | -0.81    | C2(Carbamidomethyl) | CID             | < 1% FDR   | 2.43  | 0       | 6.002E-05 | 0.00 |
| 0                  | 2      | 954.40002 | 1907.79277 | 0.19     | C2(Carbamidomethyl) | CID             | < 1% FDR   | 5.14  | 0       | 8.422E-10 | 0.00 |
| 0                  | 2      | 954.39893 | 1907.79057 | -0.96    | C2(Carbamidomethyl) | CID             | < 1% FDR   | 4.93  | 0       | 8.543E-10 | 0.00 |
| 0                  | 2      | 954.39868 | 1907.79009 | -1.22    | C2(Carbamidomethyl) | CID             | < 1% FDR   | 5.03  | 0       | 3.333E-10 | 0.00 |
| 0                  | 2      | 954.39880 | 1907.79033 | -1.09    | C2(Carbamidomethyl) | CID             | < 1% FDR   | 4.96  | 0       | 3.068E-09 | 0.00 |
| 0                  | 2      | 954.39972 | 1907.79216 | -0.13    | C2(Carbamidomethyl) | CID             | < 1% FDR   | 4.54  | 0       | 3.766E-08 | 0.00 |
| 0                  | 2      | 954.39880 | 1907.79033 | -1.09    | C2(Carbamidomethyl) | CID             | < 1% FDR   | 4.79  | 0       | 2.321E-09 | 0.00 |
| 0                  | 2      | 954.39783 | 1907.78838 | -2.12    | C2(Carbamidomethyl) | CID             | < 1% FDR   | 5.00  | 0       | 1.214E-08 | 0.00 |
| 0                  | 2      | 954.39874 | 1907.79021 | -1.16    | C2(Carbamidomethyl) | CID             | < 1% FDR   | 5.22  | 0       | 1.222E-08 | 0.00 |
| 0                  | 2      | 954.39801 | 1907.78874 | -1.92    | C2(Carbamidomethyl) | CID             | < 1% FDR   | 4.59  | 0       | 3.806E-09 | 0.00 |
| 0                  | 2      | 954.39783 | 1907.78838 | -2.12    | C2(Carbamidomethyl) | CID             | < 1% FDR   | 4.64  | 0       | 6.928E-09 | 0.00 |
| 0                  | 2      | 954.39825 | 1907.78923 | -1.67    | C2(Carbamidomethyl) | CID             | < 1% FDR   | 3.93  | 0       | 8.780E-07 | 0.00 |
| 0                  | 2      | 954.39868 | 1907.79009 | -1.22    | C2(Carbamidomethyl) | CID             | < 1% FDR   | 4.73  | 0       | 5.992E-09 | 0.00 |
| 0                  | 2      | 954.40247 | 1907.79766 | 2.75     | C2(Carbamidomethyl) | CID             | < 1% FDR   | 4.42  | 0       | 5.868E-08 | 0.00 |
| 0                  | 2      | 954.39996 | 1907.79265 | 0.12     | C2(Carbamidomethyl) | CID             | < 1% FDR   | 4.10  | 0       | 3.759E-09 | 0.00 |
| 0                  | 2      | 954.39752 | 1907.78777 | -2.44    | C2(Carbamidomethyl) | CID             | < 1% FDR   | 5.02  | 0       | 2.409E-09 | 0.00 |
| 0                  | 2      | 954.39746 | 1907.78765 | -2.50    | C2(Carbamidomethyl) | CID             | < 1% FDR   | 4.73  | 0       | 1.447E-07 | 0.00 |
| 0                  | 2      | 954.39899 | 1907.79070 | -0.90    | C2(Carbamidomethyl) | CID             | < 1% FDR   | 4.24  | 0       | 6.066E-07 | 0.00 |
| 0                  | 2      | 954.39752 | 1907.78777 | -2.44    | C2(Carbamidomethyl) | CID             | < 1% FDR   | 3.74  | 0       | 1.539E-08 | 0.00 |
| 0                  | 2      | 954.39813 | 1907.78899 | -1.80    | C2(Carbamidomethyl) | CID             | < 1% FDR   | 3.99  | 0       | 1.500E-06 | 0.00 |
| 0                  | 2      | 954.39862 | 1907.78996 | -1.28    | C2(Carbamidomethyl) | CID             | < 1% FDR   | 3.36  | 0       | 2.898E-07 | 0.00 |
| 0                  | 2      | 954.40051 | 1907.79375 | 0.70     | C2(Carbamidomethyl) | CID             | < 1% FDR   | 2.61  | 0       | 3.947E-04 | 0.00 |
| 0                  | 2      | 954.40381 | 1907.80034 | 4.15     | C2(Carbamidomethyl) | CID             | < 1% FDR   | 3.18  | 0       | 1.525E-04 | 0.00 |
| 0                  | 2      | 954.40106 | 1907.79485 | 1.27     | C2(Carbamidomethyl) | CID             | < 1% FDR   | 4.30  | 0       | 1.523E-04 | 0.00 |
| 0                  | 2      | 954.40076 | 1907.79424 | 0.95     | C2(Carbamidomethyl) | CID             | < 1% FDR   | 3.71  | 0       | 2.259E-05 | 0.00 |
| 0                  | 2      | 954.40424 | 1907.80120 | 4.60     | C2(Carbamidomethyl) | CID             | < 1% FDR   | 4.01  | 0       | 1.922E-05 | 0.00 |
| 0                  | 2      | 954.40454 | 1907.80181 | 4.92     | C2(Carbamidomethyl) | CID             | < 1% FDR   | 4.16  | 0       | 1.576E-05 | 0.00 |
| 0                  | 2      | 954.40155 | 1907.79582 | 1.79     | C2(Carbamidomethyl) | CID             | < 1% FDR   | 2.96  | 0       | 1.590E-04 | 0.00 |
| 0                  | 2      | 954.40381 | 1907.80034 | 4.15     | C2(Carbamidomethyl) | CID             | < 1% FDR   | 3.06  | 0.00057 | 1.244E-03 | 0.00 |
| 0                  | 2      | 954.39874 | 1907.79021 | -1.16    | C2(Carbamidomethyl) | CID             | < 1% FDR   | 2.53  | 0.00057 | 3.276E-03 | 0.00 |
| 0                  | 2      | 954.40308 | 1907.79888 | 3.39     | C2(Carbamidomethyl) | CID             | < 1% FDR   | 2.04  | 0.00057 | 5.954E-03 | 0.00 |

Sequence : VNNSSLIGVGYTQLRPGVK (4 items)

| # Missed Cleavages | Charge | m/z [Da]   | MH+ [Da]   | ΔM [ppm] | Modifications | Activation Type | Confidence | XCorr | q-Value | PEP       | ΔCn  |
|--------------------|--------|------------|------------|----------|---------------|-----------------|------------|-------|---------|-----------|------|
| 0                  | 3      | 701.72253  | 2103.15305 | -1.29    |               | CID             | < 1% FDR   | 2.40  | 0.00046 | 1.990E-03 | 0.00 |
| 0                  | 3      | 701.72186  | 2103.15104 | -2.25    |               | CID             | < 1% FDR   | 2.52  | 0       | 1.052E-04 | 0.00 |
| 0                  | 2      | 1052.08105 | 2103.15483 | -0.44    |               | CID             | < 1% FDR   | 2.65  | 0.00057 | 4.580E-03 | 0.00 |
| 0                  | 2      | 1052.08240 | 2103.15752 | 0.84     |               | CID             | < 1% FDR   | 3.97  | 0       | 6.514E-07 | 0.00 |

Sequence : VTGTLETK (1 item)

| # Missed Cleavages | Charge | m/z [Da]  | MH+ [Da]  | ΔM [ppm] | Modifications | Activation Type | Confidence | XCorr | q-Value | PEP       | ΔCn  |
|--------------------|--------|-----------|-----------|----------|---------------|-----------------|------------|-------|---------|-----------|------|
| 0                  | 2      | 424.73865 | 848.47002 | -2.82    |               | CID             | < 1% FDR   | 2.00  | 0.00046 | 1.522E-03 | 0.00 |

Sequence : WNTDNTLGTAEIAEDIQGLK (1 item)

| # Missed Cleavages | Charge | m/z [Da]  | MH+ [Da]   | ΔM [ppm] | Modifications        | Activation Type | Confidence | XCorr | q-Value | PEP       | ΔCn  |
|--------------------|--------|-----------|------------|----------|----------------------|-----------------|------------|-------|---------|-----------|------|
| 0                  | 3      | 840.40723 | 2519.20713 | -0.49    | C18(Carbamidomethyl) | CID             | < 1% FDR   | 3.32  | 0       | 1.450E-03 | 0.00 |

Sequence : YQLDPTASISAK (1 item)

| # Missed Cleavages | Charge | m/z [Da]  | MH+ [Da]   | ΔM [ppm] | Modifications | Activation Type | Confidence | XCorr | q-Value | PEP       | ΔCn  |
|--------------------|--------|-----------|------------|----------|---------------|-----------------|------------|-------|---------|-----------|------|
| 0                  | 2      | 647.33423 | 1293.66118 | -5.70    |               | CID             | < 1% FDR   | 2.65  | 0.00069 | 7.493E-03 | 0.00 |

# Figure S5

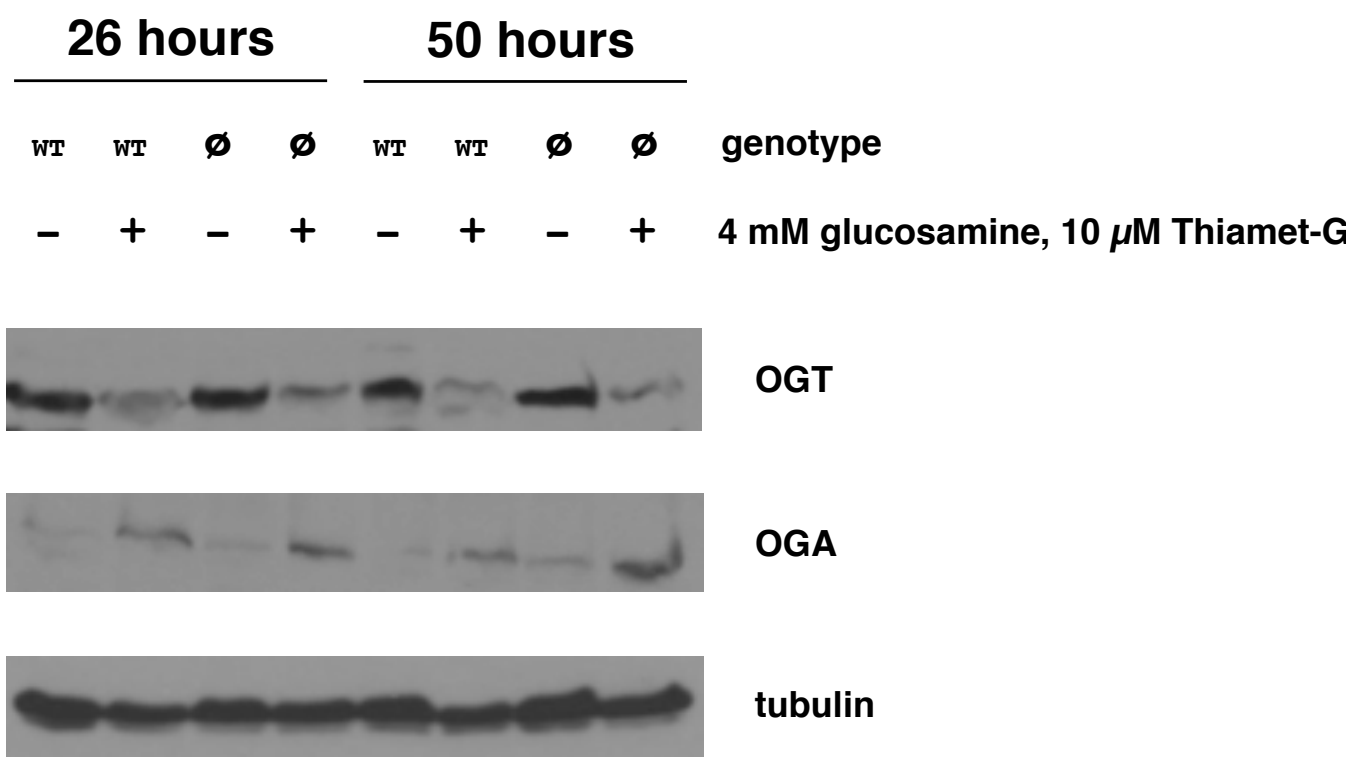

**Figure S6**

**A**

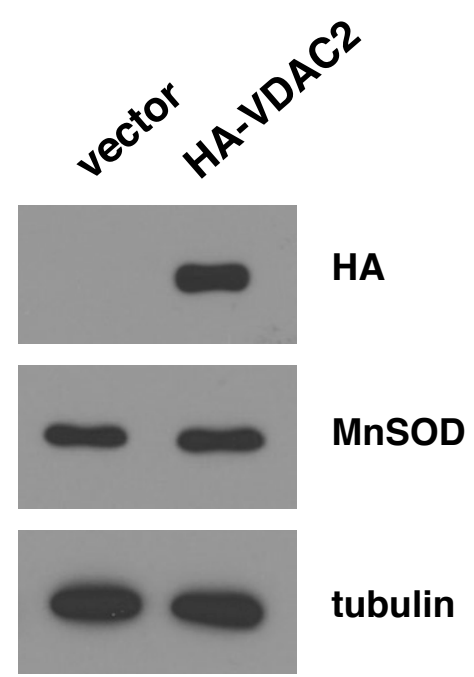

**B**

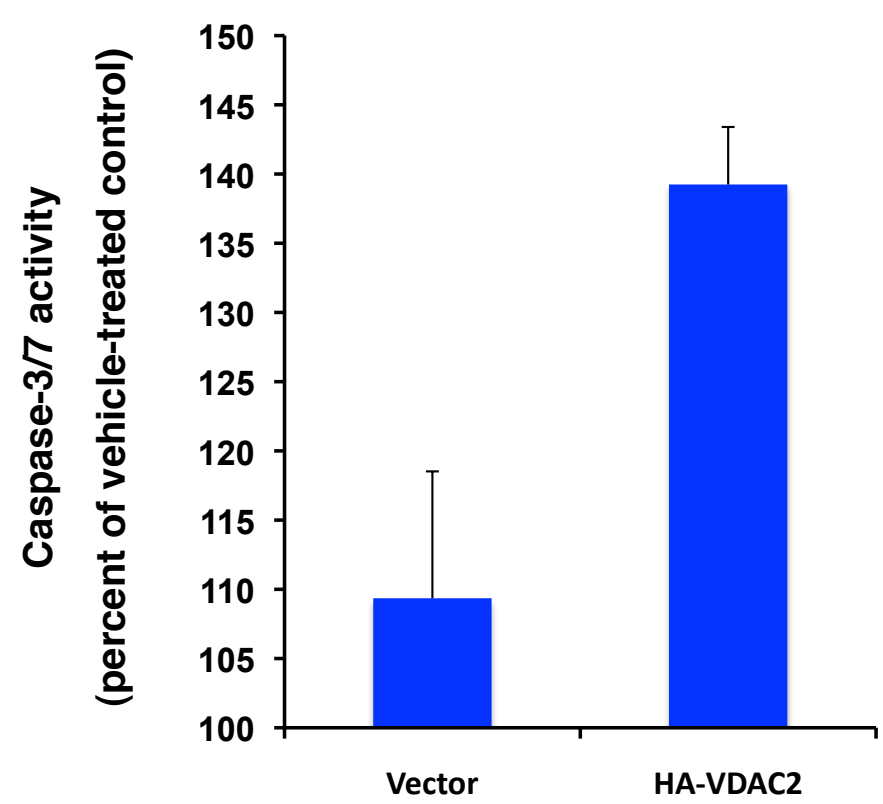

# Figure S7

HT1080

Jurkat

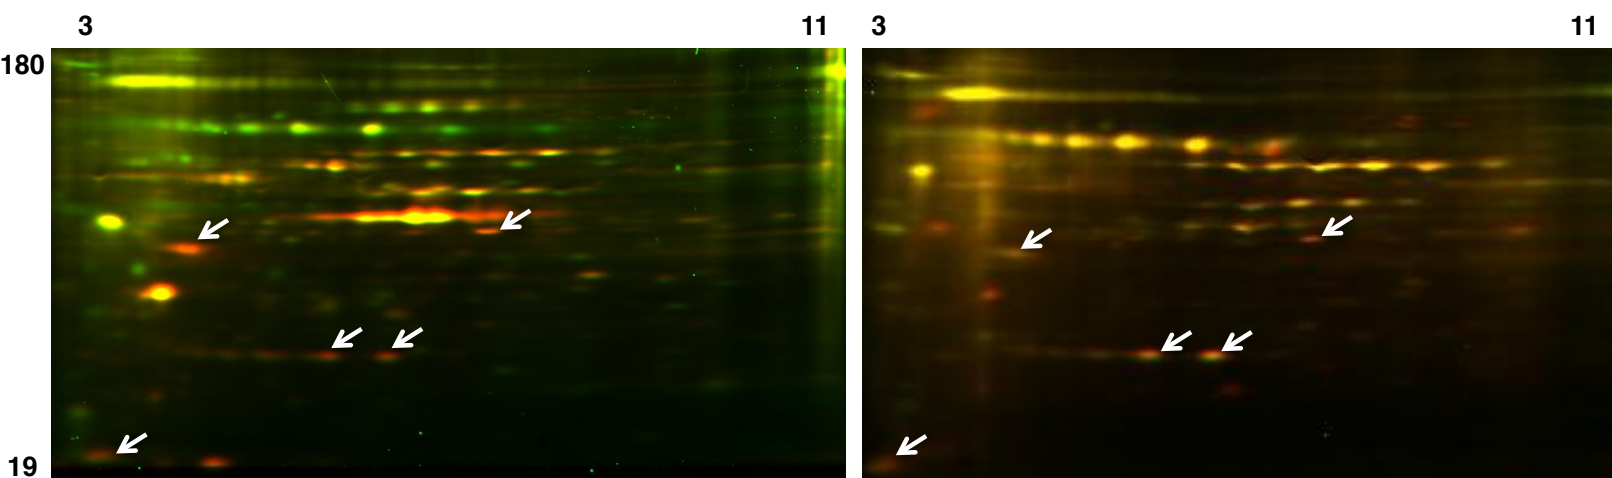

**1:** Ac<sub>4</sub>GalNAz and vehicle control

**2:** Ac<sub>4</sub>GalNAz and 1 μg/ml doxorubicin

# Figure S8

**A**

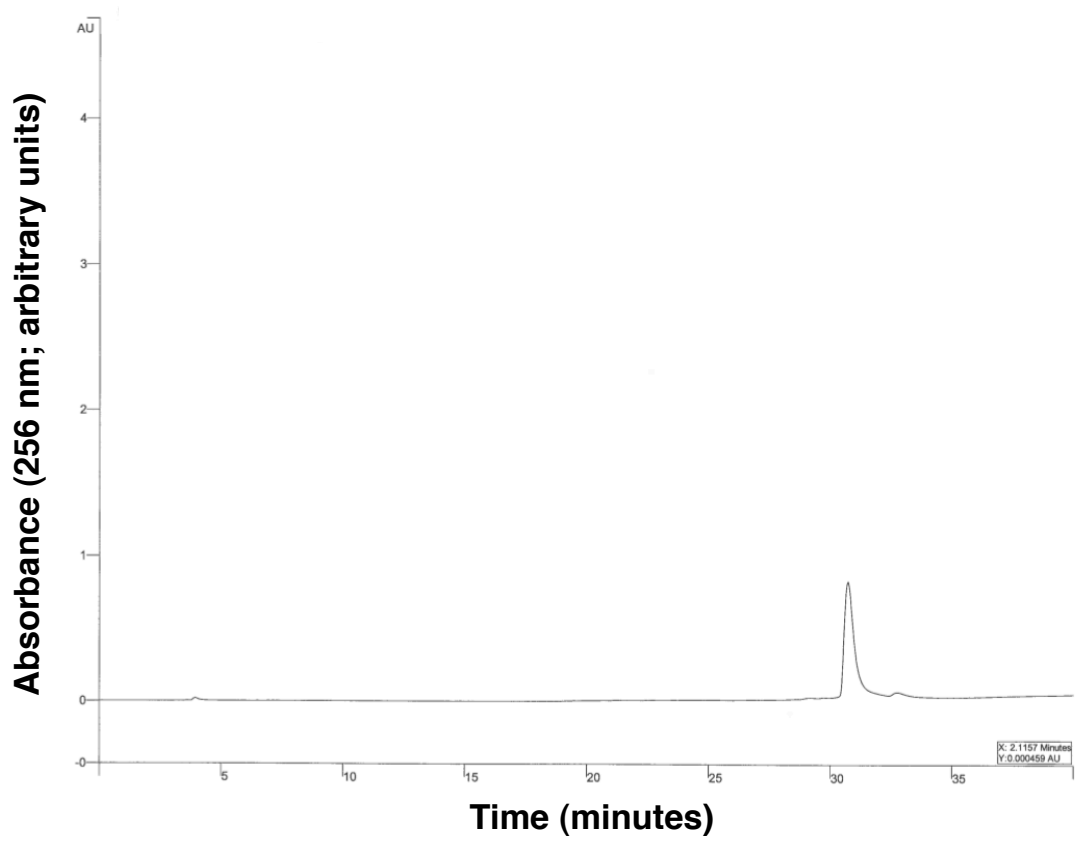

**B**

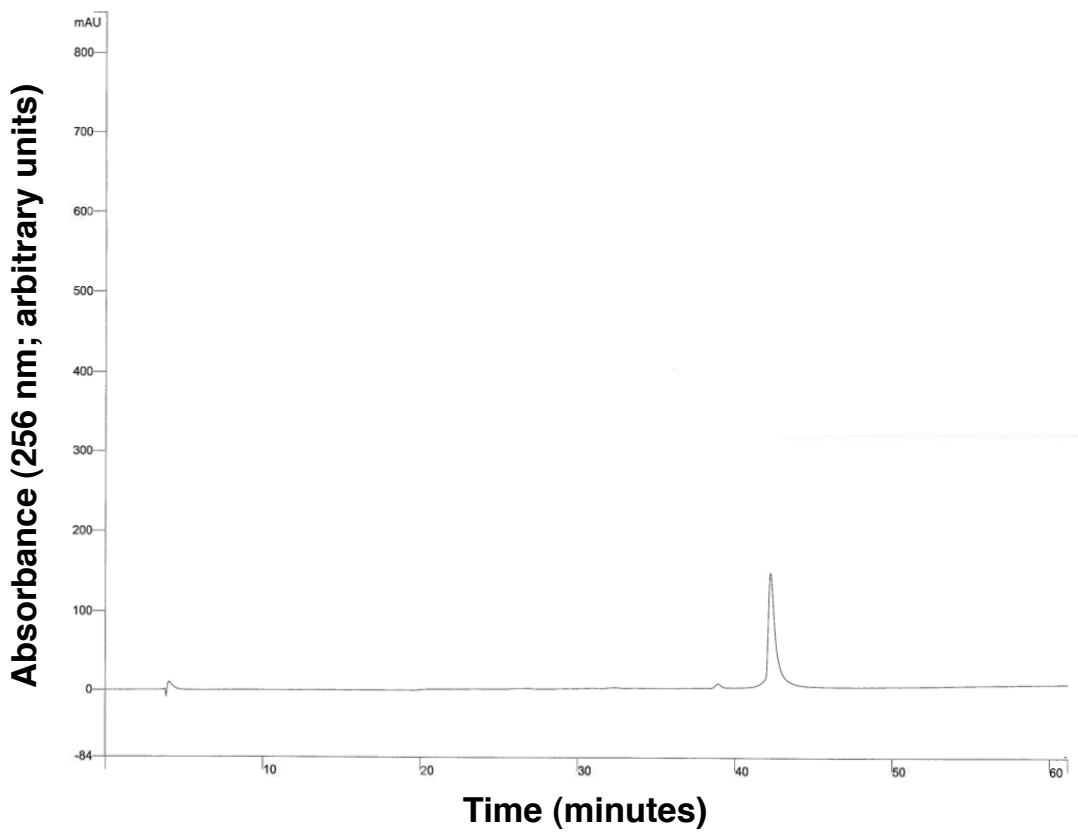

Supplement: NIHMS524960-supplement-Supplementary_Figures.pdf [file NIHMS524960-supplement-Supplementary_Figures.pdf]
